# Supplementary material for: A mouse model of 22q11.2 deletions: Molecular and behavioral signatures of Parkinson’s disease and schizophrenia
Source: PubMed Central journal article supplement — Sci Adv. 2018 Aug 15;4(8):eaar6637. doi: 10.1126/sciadv.aar6637 (PMC6093626; doi:10.1126/sciadv.aar6637), 2018-08-15
Supplement: aar6637_SM.pdf [file aar6637_SM.pdf]

## Supplementary Materials for

### **A mouse model of 22q11.2 deletions: Molecular and behavioral signatures of Parkinson's disease and schizophrenia**

Akiko Sumitomo, Kouta Horike, Kazuko Hirai, Nancy Butcher, Erik Boot,  
Takeshi Sakurai, Frederick C. Nucifora Jr., Anne S. Bassett,  
Akira Sawa, Toshifumi Tomoda\*

\*Corresponding author. Email: [ttomodal@gmail.com](mailto:ttomodal@gmail.com)

Published 15 August 2018, *Sci. Adv.* **4**, eaar6637 (2018)  
DOI: 10.1126/sciadv.aar6637

#### **This PDF file includes:**

- Fig. S1. Amplitude of responses to nonstartle sound stimuli in *Df1/+* mice during PPI assays.
- Fig. S2. Elevated expression of  $\alpha$ -synuclein and p62 in *Df1/+* mice at 8 months of age.
- Fig. S3. Elevated p62 expression in *Df1/+* mice is normalized by CCI-779 administration.
- Fig. S4. Increased mTOR activity in *Df1/+* mice is normalized by CCI-779 administration.

## Supplementary Figure 1. Sumitomo et al.

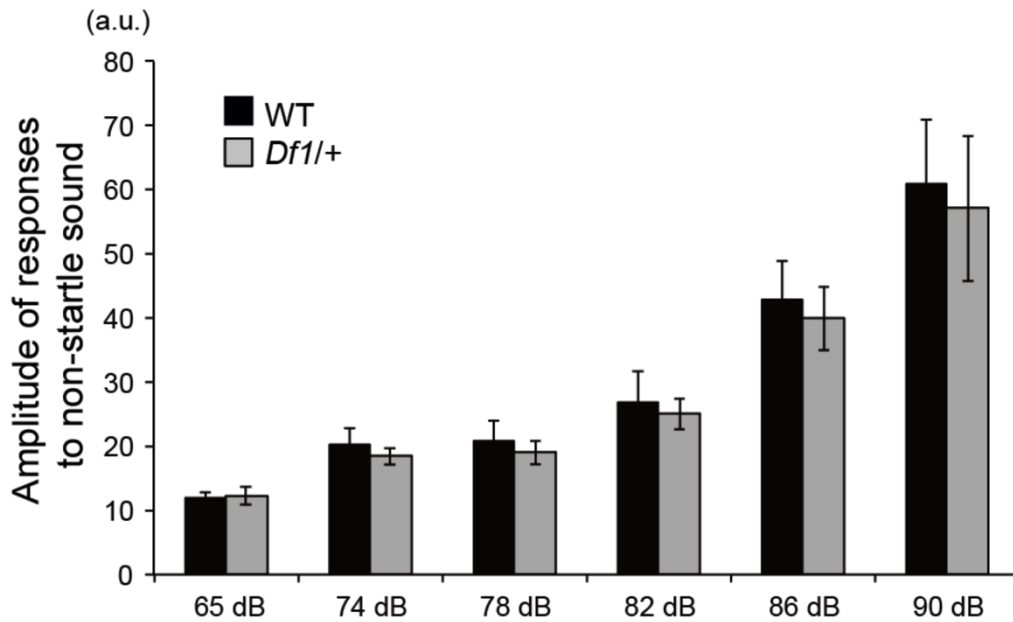

**Fig. S1. Amplitude of responses to nonstartle sound stimuli in *Df1/+* mice during PPI assays.**

The average amplitude (arbitrary unit (a.u.)  $\pm$  SEM) of responses to a series of non-startle sound stimuli (65, 74, 78, 82, 86, and 90 dB) randomly delivered to WT ( $n = 10$ ) or *Df1/+* mice ( $n = 10$ ) during the PPI assays were plotted.

Supplementary Figure 2. Sumitomo et al.

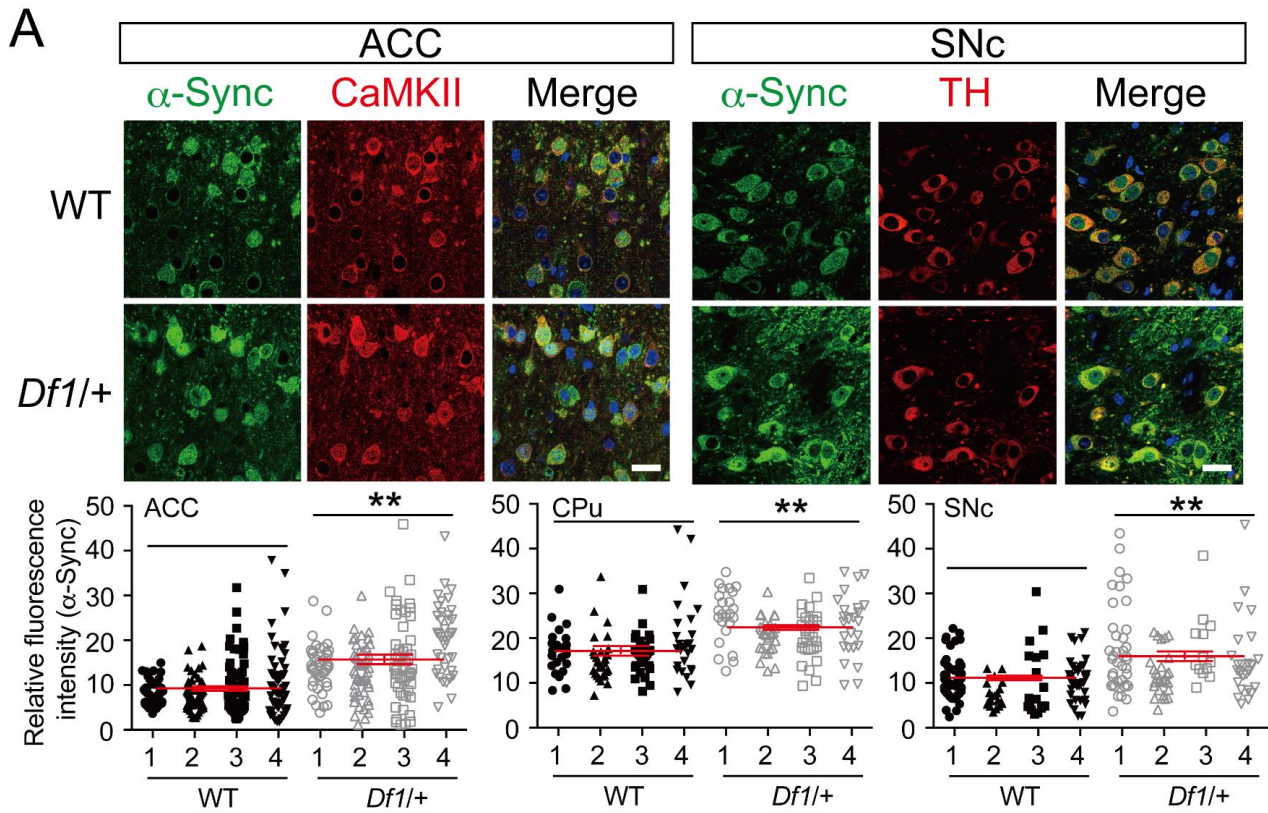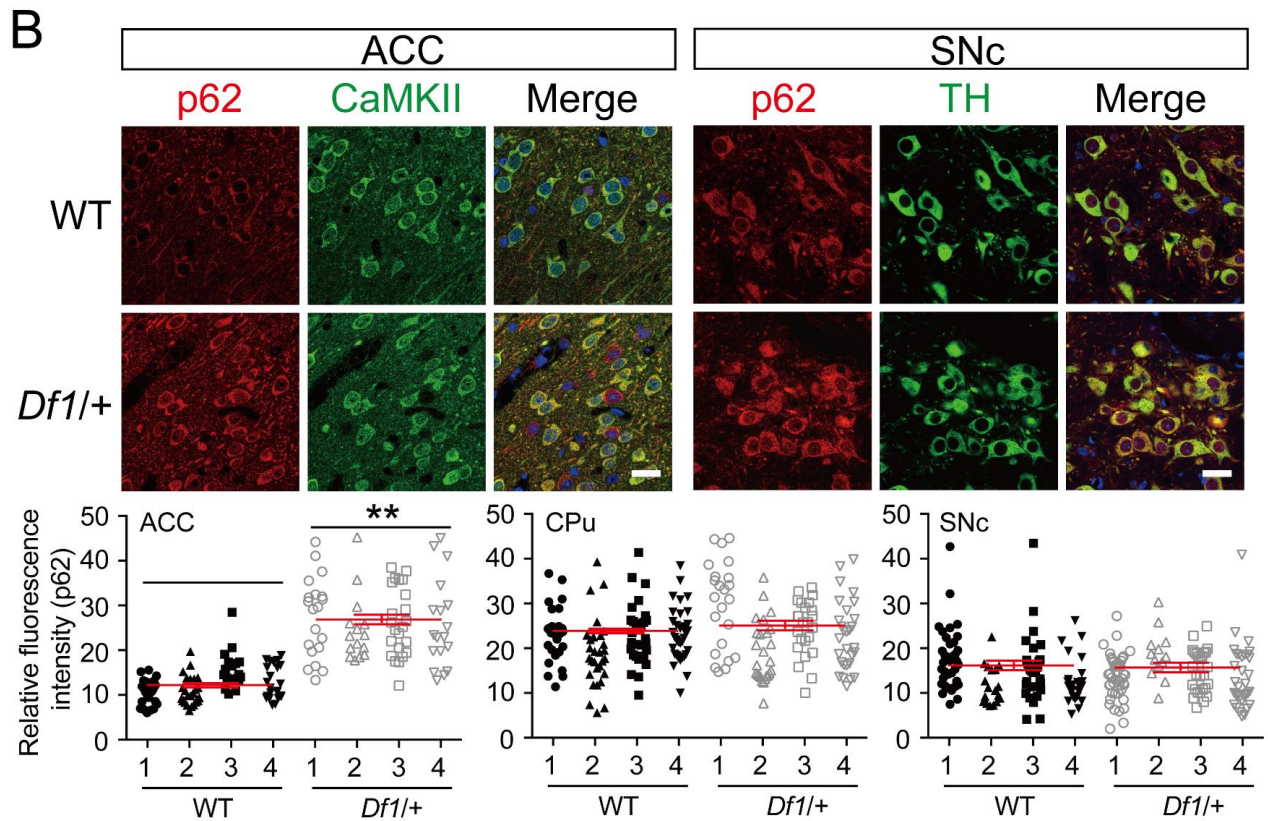

**Fig. S2. Elevated expression of  $\alpha$ -synuclein and p62 in *Df1/+* mice at 8 months of age. (A, B)**

The ACC, CPu, and SNc in *Df1/+* mice ( $n = 4$ ) and the WT littermates ( $n = 4$ ) (8 months old) were immunostained with anti- $\alpha$ -synuclein ( $\alpha$ -Syn) (A) or anti-p62 (B) antibodies, together with anti-CaMKII, anti-DARPP-32, and anti-TH antibodies, which label the most abundant neuronal cell type in the ACC, CPu, and SNc, respectively. Images were acquired by a confocal microscope using the same parameters across multiple specimens. Images in the ACC and SNc are shown. Scale bar, 20  $\mu$ m. Relative fluorescence intensities (arbitrary unit) of  $\alpha$ -Syn or p62 immunostaining were measured from each soma co-labeled with the neuronal marker (30 to 50 somas per section) and plotted in the graph. Overall average fluorescence intensities ( $\pm$ SEM) calculated across 3 to 4 serial sections per animal from all animals used ( $n = 4$  per group) are shown in red in the graph. **\*\* $P < 0.01$**  (Mann-Whitney test, two-tailed).

Supplementary Figure 3. Sumitomo et al.

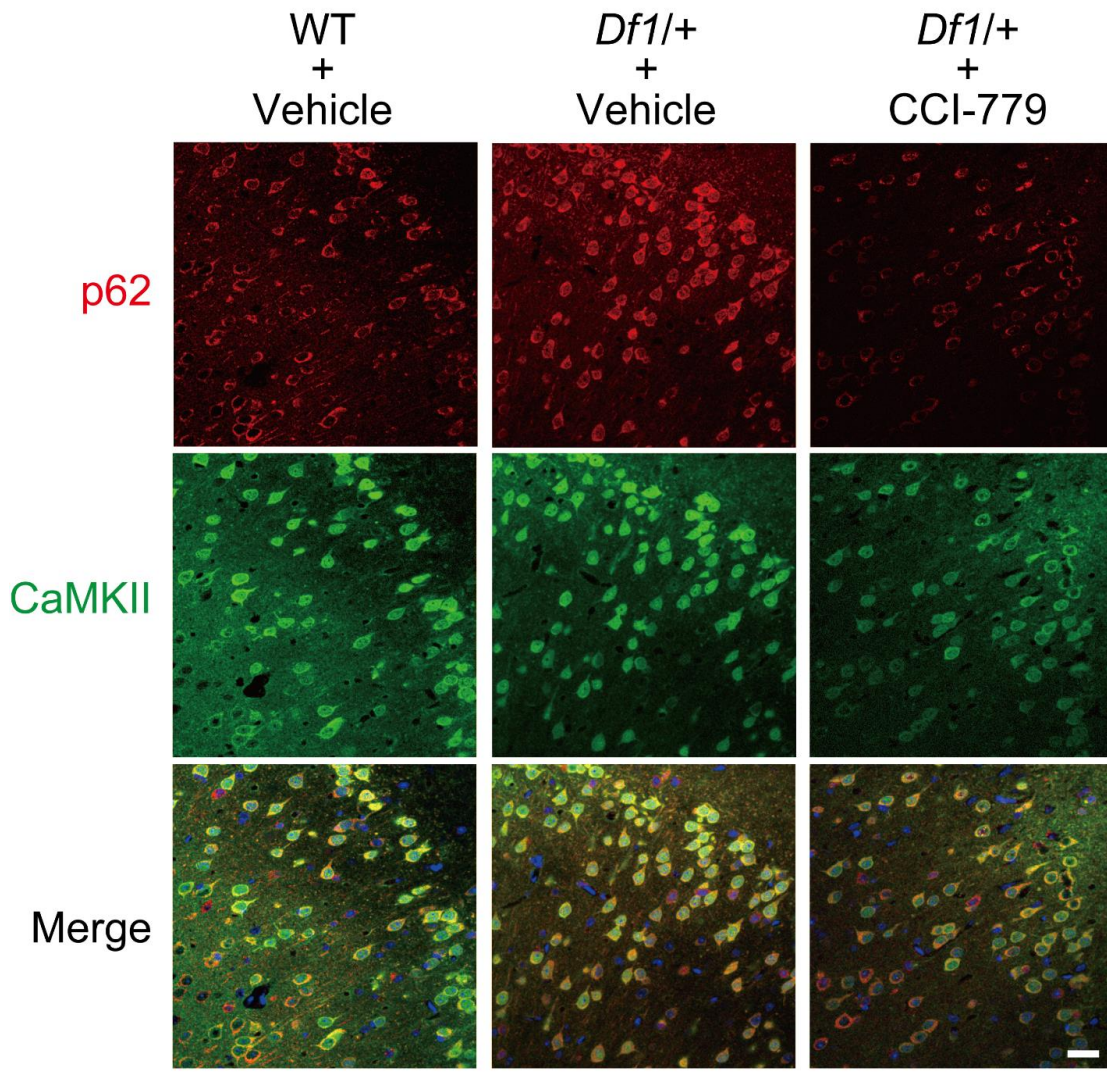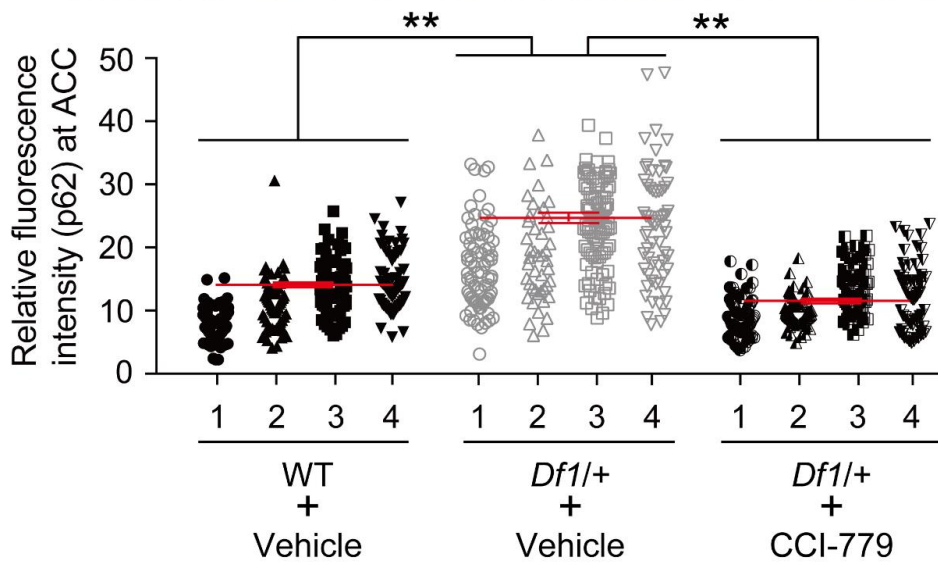

**Fig. S3. Elevated p62 expression in *Df1/+* mice is normalized by CCI-779 administration.**

The mice used for behavior assays (*i.e.*, PPI and locomotion tests) were used for this immunohistochemistry analysis. The ACC in WT mice treated with saline for 11 days ( $n = 4$ ), *Df1/+* with saline ( $n = 4$ ), and *Df1/+* with CCI-779 ( $n = 4$ ) (2 months old) were immunostained with anti-p62, together with anti-CaMKII antibody, which labels pyramidal neurons in the ACC. Images were acquired by a confocal microscope using the same parameters across multiple specimens. Scale bar, 20  $\mu\text{m}$ . Relative fluorescence intensities (arbitrary unit) of p62 immunostaining were measured from each soma co-labeled with anti-CaMKII (~50 somas per section) and plotted in the graph. Overall average fluorescence intensities ( $\pm\text{SEM}$ ) calculated across 3 to 4 serial sections per animal from all animals used ( $n = 4$  per group) are shown in red in the graph.  $^{***}P < 0.01$  (Kruskal-Wallis test followed by Dunn's multiple comparison tests).

## Supplementary Figure 4. Sumitomo et al.

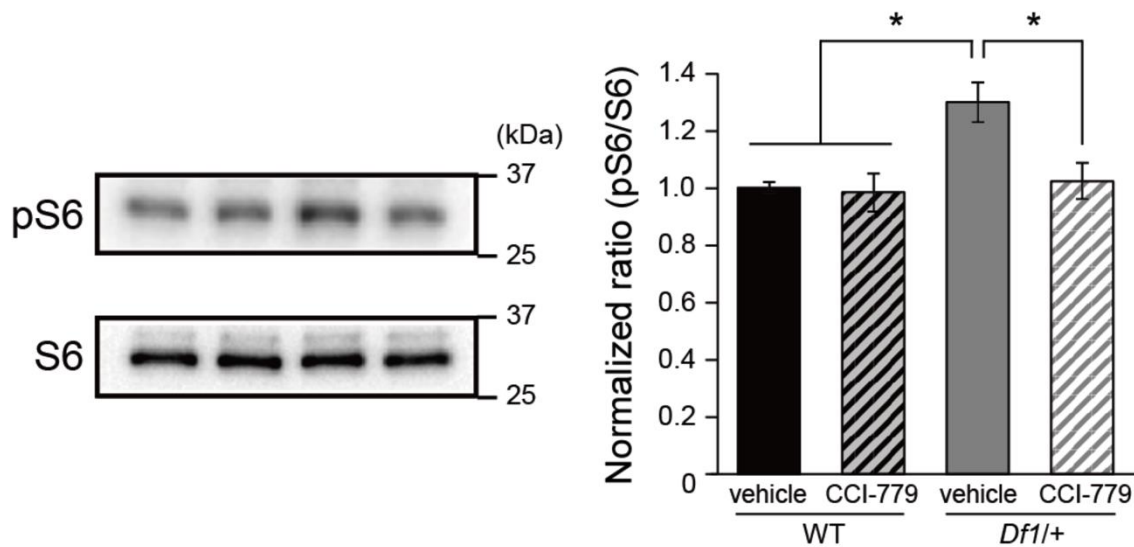

**Fig. S4. Increased mTOR activity in *Df1/+* mice is normalized by CCI-779 administration.**

The protein extracts from the anterior cingulate cortex of WT or *Df1/+* mice (2 to 3 months old,  $n = 6$  per group) chronically treated with either CCI-779 (10 mg/kg body weight; i.p., once daily for 8 consecutive days) or vehicle (saline) were analyzed by Western blot using anti-S6 ribosomal protein and anti-phospho-S6 (Ser235/236) (pS6) antibodies, and the average ratios of densitometry values of pS6 to those of total S6 (pS6/S6) ( $\pm$ SEM) were plotted in the graph.  $*P < 0.05$  (Kruskal-Wallis test followed by Dunn's multiple comparison tests).
